# Supplementary material for: A warmer and drier climate in the northern sagebrush biome does not promote cheatgrass invasion or change its response to fire
Source: PubMed Central journal article supplement (PMC5681598; doi:10.1007/s00442-017-3976-3), 2017-10-16
Supplement: 442_2017_3976_MOESM1_ESM.pdf [file 442_2017_3976_MOESM1_ESM.pdf]

**Online Resource 1** Temperature and precipitation data for Norris climate station (1908-2016). Norris climate data were downloaded from NOAA's National Centers for Environmental Information (<http://www.ncdc.noaa.gov/>).

|            |           | Mean temp. (°C) | Mean min. temp. (°C) | Mean max. temp. (°C) | Total precip. (mm) |
|------------|-----------|-----------------|----------------------|----------------------|--------------------|
| Annual     | 1908-1983 | 8.10            | 1.80                 | 14.40                | 451.10             |
|            | 1984-2013 | 9.09            | 2.82                 | 15.28                | 424.15             |
|            | 2014      | 9.54            | 3.73                 | 15.33                | 611.64             |
|            | 2015      | 10.81           | 4.88                 | 16.79                | 563.36             |
|            | 2016      | 10.63           | 4.78                 | 16.47                | 512.31             |
| Jan-March  | 1908-1983 | -1.15           | -6.24                | 3.94                 | 63.85              |
|            | 1984-2013 | 0.85            | -4.17                | 5.84                 | 50.85              |
|            | 2014      | 1.06            | -3.48                | 5.57                 | 128.53             |
|            | 2015      | 4.72            | -0.56                | 9.98                 | 46.98              |
|            | 2016      | 4.00            | -0.71                | 8.71                 | 78.99              |
| April-June | 1908-1983 | 11.52           | 4.71                 | 18.32                | 196.76             |
|            | 1984-2013 | 12.24           | 5.55                 | 18.89                | 194.90             |
|            | 2014      | 12.41           | 6.11                 | 18.68                | 217.17             |
|            | 2015      | 13.59           | 7.18                 | 19.98                | 232.67             |
|            | 2016      | 13.94           | 7.33                 | 20.56                | 174.75             |
| July-Sept. | 1908-1983 | 18.57           | 10.45                | 26.67                | 113.06             |
|            | 1984-2013 | 19.35           | 11.33                | 27.34                | 106.36             |
|            | 2014      | 19.29           | 11.94                | 26.6                 | 170.69             |
|            | 2015      | 20.02           | 12.39                | 27.74                | 137.41             |
|            | 2016      | 19.33           | 11.94                | 26.74                | 121.16             |
| Oct.-Dec.  | 1908-1983 | 3.33            | -1.90                | 8.55                 | 78.26              |
|            | 1984-2013 | 3.53            | -1.57                | 8.60                 | 70.07              |
|            | 2014      | 5.59            | 0.34                 | 10.44                | 95.25              |
|            | 2015      | 4.93            | 0.50                 | 9.44                 | 146.30             |
|            | 2016      | 5.22            | 0.54                 | 9.87                 | 137.41             |
