# Supplementary material for: A warmer and drier climate in the northern sagebrush biome does not promote cheatgrass invasion or change its response to fire
Source: PubMed Central journal article supplement (PMC5681598; doi:10.1007/s00442-017-3976-3), 2017-10-16
Supplement: 442_2017_3976_MOESM4_ESM.pdf [file 442_2017_3976_MOESM4_ESM.pdf]

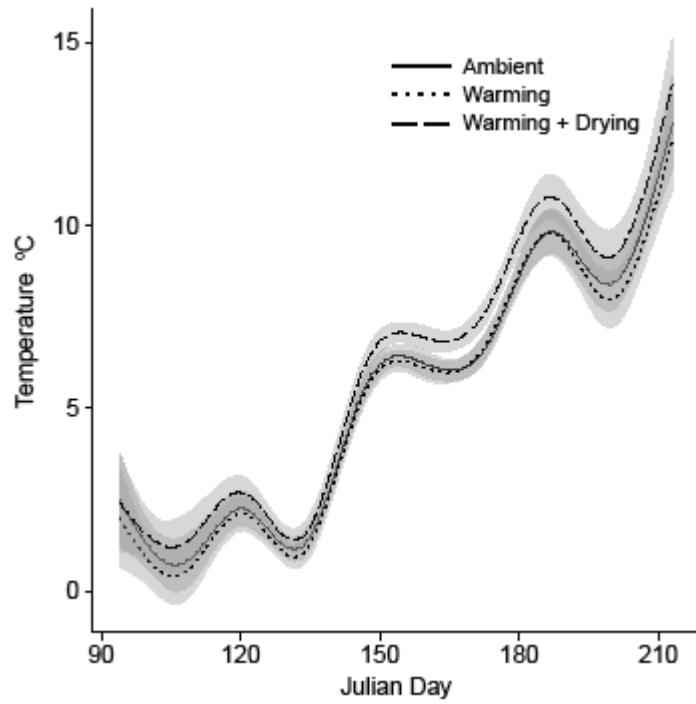

**Online Resource 4** Mean minimum temperature data for the ambient (solid line), warming (dotted line), and warming + drying (dashed line) climate treatments (2014 – 2016), with the associated 95% confidence interval.
